# Supplementary material for: Food-Like Growth Conditions Support Production of Active Vitamin B12 by Propionibacterium freudenreichii 2067 without DMBI, the Lower Ligand Base, or Cobalt Supplementation
Source: PubMed Central journal article supplement (PMC5340759; doi:10.3389/fmicb.2017.00368), 2017-03-08
Supplement: DataSheet1.pdf [file DataSheet1.pdf]

## *Supplementary material*

### **Food-like growth conditions support production of active vitamin B12 by *Propionibacterium freudenreichii* without DMBI or cobalt supplementation.**

**P. Deptula, B. Chamlagain, M. Edelmann, P. Sangsuwan, T. A. Nyman, K. Savijoki, V. Piironen, P. Varmanen**

\* **Correspondence:** Pekka Varmanen pekka.varmanen@helsinki.fi

#### **16S rDNA sequence analysis**

The *P. freudenreichii* strain 2067kk (Valio Ltd) isolated from dairy environment was subjected to genotypic analysis by the partial sequencing of a 500 bp internal fragment (nucleotides 27–518) of the 16S rDNA gene. The strain was cultured in 10 mL of PPA medium at 30°C for four days under microaerophilic conditions. Cells were harvested by centrifugation (3220 g, 10 min, 4°C) and washed once with ice-cold 50mM TRIS pH 8.0. Cells were disrupted with glass beads ( $\leq 106 \mu\text{m}$  in diameter; Sigma) in a Fast Prep-24 homogeniser (MP Biomedicals, France) in three 30-seconds 6,5 m/s cycles with one-minute cooling on ice between the cycles. PCR was performed from cell lysates using the universal 16S rDNA primers p8F (5'AGAGTTTGATCCTGGCTCAG3') and pfRev (5'ACGAGCTGACGACAGCCATG3') (Edwards et al., 1989), and the PCR products were sequenced using a BigDye terminator cycle sequencing kit with the primer pdRev (5'GTATTACCGCGGCTGCTG3'), in the DNA sequencing laboratory of the Institute of Biotechnology, University of Helsinki, Helsinki, Finland. Sequencing reactions were run on an ABI 3700 automated DNA Sequencer (Applied Biosystems, Foster City, CA, USA). The sequence data was compared to all 16S-rRNA sequences of bacteria in the gene bank, using the BlastN tool (<http://www.ncbi.nlm.nih.gov/BLAST/>). The Blast search using the obtained sequence as query revealed 100% identity with the annotated *Propionibacterium freudenreichii* subsp. *shermanii* CIRM-BIA (Figure S1) 16S rDNA gene sequence (Falentin et al. 2010), while 99% identity to the sequence from the type strain of *Propionibacterium freudenreichii* subsp. *freudenreichii* DSM 20271 (Koskinen et al. 2015) was found and therefore we concluded that the identity of the selected strain is *P. freudenreichii* subsp. *shermanii*.

| Score          | Expect | Identities                                                    | Gaps      | Strand    |
|----------------|--------|---------------------------------------------------------------|-----------|-----------|
| 1421 bits(769) | 0.0    | 769/769(100%)                                                 | 0/769(0%) | Plus/Plus |
| Query 1        |        | CCCCGTGGAAGGGACCCACACCTAGTACCCACCGTTTACGGCGTGGACTACCAGGGTATC  |           | 60        |
|                |        |                                                               |           |           |
| Sbjct 1539504  |        | CCCCGTGGAAGGGACCCACACCTAGTACCCACCGTTTACGGCGTGGACTACCAGGGTATC  |           | 1539563   |
| Query 61       |        | TAAGCCTGTTTGCTCCCCACGCTTTCGCTTCTCAGCGTCAGGAAATGTCCAGAGAACCGC  |           | 120       |
|                |        |                                                               |           |           |
| Sbjct 1539564  |        | TAAGCCTGTTTGCTCCCCACGCTTTCGCTTCTCAGCGTCAGGAAATGTCCAGAGAACCGC  |           | 1539623   |
| Query 121      |        | CTTCGCCACTGGTGTCTTCCCGATATCTGCGCATTCACCGCTCCACCGAGAGTTCAT     |           | 180       |
|                |        |                                                               |           |           |
| Sbjct 1539624  |        | CTTCGCCACTGGTGTCTTCCCGATATCTGCGCATTCACCGCTCCACCGAGAGTTCAT     |           | 1539683   |
| Query 181      |        | TCTCCCCTACATTCTCAAGTCAACCCGATCGAAAGCAAGCCCAGAGTTAAGCCCTGGA    |           | 240       |
|                |        |                                                               |           |           |
| Sbjct 1539684  |        | TCTCCCCTACATTCTCAAGTCAACCCGATCGAAAGCAAGCCCAGAGTTAAGCCCTGGA    |           | 1539743   |
| Query 241      |        | ATTTCACTTCCGACGTGATCAACCGCCTACAAGCTCTTTACGCCAATAATTCCGGACAA   |           | 300       |
|                |        |                                                               |           |           |
| Sbjct 1539744  |        | ATTTCACTTCCGACGTGATCAACCGCCTACAAGCTCTTTACGCCAATAATTCCGGACAA   |           | 1539803   |
| Query 301      |        | CGCTCGCACCCCTACGTATCACCGCGGCTGCTGGCACGTAGTTAGCCGGTGCTTCTTCTCC |           | 360       |
|                |        |                                                               |           |           |
| Sbjct 1539804  |        | CGCTCGCACCCCTACGTATCACCGCGGCTGCTGGCACGTAGTTAGCCGGTGCTTCTTCTCC |           | 1539863   |
| Query 361      |        | CACTACCGTCACTTGCCTTCGTATGGATGAAAGCGGTTTACAACCCGAAGCCGTCAT     |           | 420       |
|                |        |                                                               |           |           |
| Sbjct 1539864  |        | CACTACCGTCACTTGCCTTCGTATGGATGAAAGCGGTTTACAACCCGAAGCCGTCAT     |           | 1539923   |
| Query 421      |        | CCCGCACGCGGCGTTGCTGCATCAGGCTTGCGCCATTGTGCAATATCCCCACTGCTGC    |           | 480       |
|                |        |                                                               |           |           |
| Sbjct 1539924  |        | CCCGCACGCGGCGTTGCTGCATCAGGCTTGCGCCATTGTGCAATATCCCCACTGCTGC    |           | 1539983   |
| Query 481      |        | CTCCCGTAGGAGTCTGGGCGTATCTCAGTCCCAATGTGGCCGGTCACCCTCTCAGGCCG   |           | 540       |
|                |        |                                                               |           |           |
| Sbjct 1539984  |        | CTCCCGTAGGAGTCTGGGCGTATCTCAGTCCCAATGTGGCCGGTCACCCTCTCAGGCCG   |           | 1540043   |
| Query 541      |        | GCTACCCGTCGCTGCCTTGGTAGGCCATTACCCACCAACAAGCTGATAGGCCGCGAGAC   |           | 600       |
|                |        |                                                               |           |           |
| Sbjct 1540044  |        | GCTACCCGTCGCTGCCTTGGTAGGCCATTACCCACCAACAAGCTGATAGGCCGCGAGAC   |           | 1540103   |
| Query 601      |        | GATCCCTGACCGCATAAAGCTTTCCAACCCAACCCATGCAGGCCAGGCTCATATTCGGGA  |           | 660       |
|                |        |                                                               |           |           |
| Sbjct 1540104  |        | GATCCCTGACCGCATAAAGCTTTCCAACCCAACCCATGCAGGCCAGGCTCATATTCGGGA  |           | 1540163   |
| Query 661      |        | TTACCACCAGTTTCTGGAGCTATACCGAAGTCAAGGGCACGTTCTCAGTGTACTCA      |           | 720       |
|                |        |                                                               |           |           |
| Sbjct 1540164  |        | TTACCACCAGTTTCTGGAGCTATACCGAAGTCAAGGGCACGTTCTCAGTGTACTCA      |           | 1540223   |
| Query 721      |        | CCCGTTCGCCACTCGTGTACCCCCGAAAGGGGCCTTACCGTCCGACTT              | 769       |           |
|                |        |                                                               |           |           |
| Sbjct 1540224  |        | CCCGTTCGCCACTCGTGTACCCCCGAAAGGGGCCTTACCGTCCGACTT              | 1540272   |           |

**Figure S1** The 16S rDNA sequence alignment. Query: *P. freudenreichii* 2067, Subject: *P. freudenreichii* CIRM-BIA1<sup>T</sup>

**Table S1** List of proteins detected by nano-LC-MS/MS from spots with relative abundance fold change  $\geq 1.4$  (ANOVA,  $p \leq 0.05$ ) from PPA and WBM media during exponential growth phase. Spots with single identification are in bold. From spots with multiple protein identification those with the highest Mascot identification score are indicated and marked with an asterisk. Proteins identified from the spots with fold change 1.4 are marked gray.

| Spot no. | Fold change (PPA/WBM) | Mw    | ID Score < 0.05 | (p | No of pept. | Seq. cov. (%) | pI   | Locus in reference organism | Name  | Annotation                                                                        | Category                                                                                                |
|----------|-----------------------|-------|-----------------|----|-------------|---------------|------|-----------------------------|-------|-----------------------------------------------------------------------------------|---------------------------------------------------------------------------------------------------------|
| 1        | 1.5                   | 77306 | 571             |    | 6           | 15%           | 5.3  | PFREUD_22890                | NadE  | <i>Amino acid metabolism</i><br>glutamine-dependent NAD(+) synthetase             | Metabolism of amino acids and related molecules                                                         |
| 3        | 1.4                   | 65568 | 592             |    | 7           | 20%           | 4.86 | PFREUD_08920                | LeuA1 | 2-isopropylmalate synthase                                                        | Metabolism of amino acids and related molecules                                                         |
| 13       | 1.6                   | 40364 | 213             |    | 2           | 11%           | 4.97 | PFREUD_18160                | SerC  | phosphoserine aminotransferase                                                    | Metabolism of coenzymes and prosthetic groups                                                           |
| 20*      | -1.7                  | 36744 | 387             |    | 4           | 20%           | 5.16 | PFREUD_20100                | ASADH | aspartate-semialdehyde dehydrogenase                                              | Metabolism of amino acids and related molecules                                                         |
| 12       | 2.1                   | 39475 | 304             |    | 8           | 24%           | 4.77 | PFREUD_19880                | Ino1  | inositol-1-phosphate synthase                                                     | <i>Carbohydrate metabolism</i><br><i>Inositol metabolism</i><br>Specific carbohydrate metabolic pathway |
| 21*      | -1.7                  | 38657 | 323             |    | 6           | 19%           | 4.84 | PFREUD_19010                | IoIE  | 2-keto-myo-inositol dehydratase                                                   | Specific carbohydrate metabolic pathway                                                                 |
| 4        | 2.3                   | 63781 | 147             |    | 4           | 12%           | 5.71 | PFREUD_16710                | D-LDH | <i>Pyruvate metabolism</i><br>d-lactate dehydrogenase                             | Membrane bioenergetics                                                                                  |
| 7*       | 1.6                   | 54126 | 1831            |    | 36          | 78%           | 5.17 | PFREUD_15390                | Pyk1  | pyruvate kinase 1                                                                 | Main glycolytic pathways                                                                                |
| 1*       | 1.5                   | 80242 | 1411            |    | 28          | 53%           | 5.29 | PFREUD_07650                | MutB  | <i>Wood Werkman -TCA</i><br>Methylmalonyl-CoA mutase large subunit                | Metabolism of carbohydrates and related molecules                                                       |
| 21       | -1.7                  | 35059 | 141             |    | 2           | 7%            | 4.95 | PFREUD_06860                | MDH   | malate dehydrogenase                                                              | Metabolism of carbohydrates and related molecules                                                       |
| 7        | 1.6                   | 59283 | 343             |    | 4           | 14%           | 5.34 | PFREUD_18870                | PycB  | methylmalonyl-CoA carboxyltransferase 5S subunit monomer                          | Metabolism of carbohydrates and related molecules                                                       |
| 22       | -2.8                  | 35214 | 180             |    | 2           | 11%           | 5.37 | PFREUD_02620                | GalE  | <i>Lactose metabolism</i><br>UDP-glucose 4-epimerase                              | Specific carbohydrate metabolic pathway                                                                 |
| 23*      | -1.5                  | 37022 | 584             |    | 8           | 32%           | 5.21 | PFREUD_19150                | Fba1  | Fructose-bisphosphate aldolase II                                                 | Main glycolytic pathways                                                                                |
| 4*       | 2.3                   | 59534 | 1731            |    | 41          | 73%           | 5.58 | PFREUD_12990                | GlpA  | <i>Lipid metabolism</i><br>anaerobic glycerol-3-phosphate dehydrogenase subunit A | Specific carbohydrate metabolic pathway                                                                 |
| 9*       | 1.5                   | 45884 | 1629            |    | 29          | 66%           | 5.27 | PFREUD_12980                | GlpB  | anaerobic glycerol-3-phosphate dehydrogenase subunit B                            | Specific carbohydrate metabolic pathway                                                                 |

|                               |             |              |             |           |            |             |                     |              |                                                        |                                                                                 |
|-------------------------------|-------------|--------------|-------------|-----------|------------|-------------|---------------------|--------------|--------------------------------------------------------|---------------------------------------------------------------------------------|
| 10                            | 1.5         | 45884        | 999         | 11        | 40%        | 5.27        | PFREUD_12980        | GlpB         | anaerobic glycerol-3-phosphate dehydrogenase subunit B | Specific carbohydrate metabolic pathway                                         |
| 10                            | 1.5         | 43861        | 989         | 15        | 73%        | 5.07        | PFREUD_09410        | FabF         | 3-oxoacyl-ACP synthase                                 | 2.4 Metabolism of lipids                                                        |
| 11*                           | 1.5         | 45661        | 1249        | 16        | 46%        | 4.79        | PFREUD_02430        | CaiB         | crotonobetainyl-CoA:carnitine CoA-transferase          | 2.4 Metabolism of lipid                                                         |
| 13*                           | 1.6         | 43073        | 1150        | 22        | 58%        | 4.89        | PFREUD_02420        | CaiA         | putative acyl-CoA dehydrogenase                        | 2.4 Metabolism of lipids                                                        |
| <b>14</b>                     | <b>1.5</b>  | <b>31894</b> | <b>487</b>  | <b>9</b>  | <b>15%</b> | <b>4.8</b>  | <b>PFREUD_09430</b> | <b>FabH</b>  | <b>3-oxoacyl-ACP synthase</b>                          | <b>2.4 Metabolism of lipids</b>                                                 |
| <b>15</b>                     | <b>1.4</b>  | <b>32914</b> | <b>1038</b> | <b>27</b> | <b>65%</b> | <b>5.4</b>  | <b>PFREUD_02450</b> | <b>MaoC</b>  | <b>MaoC acyl dehydratase</b>                           | <b>2.4 Metabolism of lipids</b>                                                 |
| 17*                           | 2.2         | 28116        | 396         | 4         | 34%        | 4.59        | PFREUD_19890        | MmsB         | beta-hydroxyacid dehydrogenase                         | 2.4 Metabolism of lipids                                                        |
| 17                            | 2.2         | 28117        | 326         | 8         | 18%        | 4.6         | PFREUD_23160        | UgpQ2        | glycerophosphoryl diester phosphodiesterase            | 2.4 Metabolism of lipids                                                        |
| <i>Membrane bioenergetics</i> |             |              |             |           |            |             |                     |              |                                                        |                                                                                 |
| <b>5</b>                      | <b>1.4</b>  | <b>60757</b> | <b>1691</b> | <b>33</b> | <b>65%</b> | <b>5.45</b> | <b>PFREUD_01830</b> | <b>GLS</b>   | <b>Putative glutamate synthase</b>                     | <b>1.4 membrane bioenergetics (electron transport subunit and ATP synthase)</b> |
| <b>8</b>                      | <b>2.2</b>  | <b>52579</b> | <b>1706</b> | <b>30</b> | <b>69%</b> | <b>4.67</b> | <b>PFREUD_10490</b> | <b>AtpD</b>  | <b>ATP synthase subunit beta</b>                       | <b>1.4 Membrane bioenergetics</b>                                               |
| <b>16</b>                     | <b>2.3</b>  | <b>29633</b> | <b>676</b>  | <b>12</b> | <b>51%</b> | <b>4.54</b> | <b>PFREUD_02490</b> | <b>FixB</b>  | <b>electron transfer flavoprotein FixB</b>             | <b>1.4 Membrane bioenergetics</b>                                               |
| <i>Transport proteins</i>     |             |              |             |           |            |             |                     |              |                                                        |                                                                                 |
| 3                             | 1.4         | 62791        | 157         | 2         | 6%         | 4.9         | PFREUD_07970        | <u>ChvD</u>  | ABC transporter ATP-binding protein                    | 1.2 Transport/binding proteins and lipoproteins                                 |
| 22*                           | -2.8        | 30956        | 577         | 17        | 43%        | 5.88        | PFREUD_01620        | SalX         | ABC transporter ATP-binding protein                    | 1.2 Transport/binding proteins and lipoproteins                                 |
| <i>Protein synthesis</i>      |             |              |             |           |            |             |                     |              |                                                        |                                                                                 |
| <b>2</b>                      | <b>1.5</b>  | <b>64546</b> | <b>709</b>  | <b>9</b>  | <b>22%</b> | <b>5.16</b> | <b>PFREUD_11940</b> | <b>GlnRS</b> | <b>glutaminyl-tRNA synthetase</b>                      | <b>Aminoacyl-tRNA synthetases</b>                                               |
| 3*                            | 1.4         | 64150        | 1792        | 24        | 47%        | 4.83        | PFREUD_14690        | ProRS        | prolyl-tRNA synthetase                                 | Aminoacyl-tRNA synthetases                                                      |
| 3                             | 1.4         | 76982        | 445         | 6         | 14%        | 4.83        | PFREUD_05640        | EF-G         | elongation factor G                                    | Translation elongation                                                          |
| <b>6</b>                      | <b>1.5</b>  | <b>56027</b> | <b>274</b>  | <b>2</b>  | <b>20%</b> | <b>5.79</b> | <b>PFREUD_13090</b> | <b>MiaB1</b> | <b>2-methylthioadenine synthetase</b>                  | <b>Translation elongation</b>                                                   |
| 10*                           | 1.5         | 35694        | 1472        | 18        | 71%        | 5.12        | PFREUD_14780        | RpsB         | 30S ribosomal protein S2                               | Ribosomal proteins                                                              |
| 11                            | 1.5         | 46219        | 819         | 7         | 38%        | 4.82        | PFREUD_14130        | CysRS1       | cysteinyl-tRNA synthetase                              | Aminoacyl-tRNA synthetases                                                      |
| 11                            | 1.5         | 39306        | 233         | 2         | 14%        | 4.78        | PFREUD_10360        | PrfA         | peptide chain release factor 1                         | Nonribosomal protein synthesis                                                  |
| 17                            | 2.2         | 20647        | 318         | 4         | 20%        | 4.66        | PFREUD_11510        | EF-P         | elongation factor P                                    | Translation elongation                                                          |
| <i>Peptidases</i>             |             |              |             |           |            |             |                     |              |                                                        |                                                                                 |
| 10                            | 1.5         | 44572        | 590         | 6         | 22%        | 5.23        | PFREUD_18560        | AbgB         | peptidase, M20/M25/M40 family                          | Metabolism of amino acids and related molecules                                 |
| 10                            | 1.5         | 45372        | 112         | 2         | 5%         | 5.14        | PFREUD_16940        | ApeB         | aminopeptidase                                         | Protein degradation                                                             |
| <i>Stress proteins</i>        |             |              |             |           |            |             |                     |              |                                                        |                                                                                 |
| 1                             | 1.5         | 94317        | 1003        | 15        | 16%        | 5.33        | PFREUD_17920        | ClpB2        | ATP-dependent Clp protease B2                          | Protein folding                                                                 |
| 4                             | 2.3         | 56504        | 203         | 5         | 13%        | 4.72        | PFREUD_18470        | GroL2        | molecular chaperone GroEL                              | Protein folding                                                                 |
| 19                            | -1.5        | 93458        | 3811        | 61        | 71%        | 5.07        | PFREUD_19250        | ClpB1        | ATP-dependent Clp protease B1                          | Protein folding                                                                 |
| 23                            | -1.5        | 33620        | 362         | 4         | 22%        | 5.14        | PFREUD_16420        | Cys2         | cysteine synthase                                      | Metabolism of amino acids and related molecules                                 |
| <b>24</b>                     | <b>-1.5</b> | <b>33620</b> | <b>903</b>  | <b>16</b> | <b>58%</b> | <b>5.14</b> | <b>PFREUD_16420</b> | <b>Cys2</b>  | <b>cysteine synthase</b>                               | <b>Metabolism of amino acids and related molecules</b>                          |
| <b>25</b>                     | <b>-1.9</b> | <b>33620</b> | <b>1557</b> | <b>34</b> | <b>82%</b> | <b>5.14</b> | <b>PFREUD_16420</b> | <b>Cys2</b>  | <b>cysteine synthase</b>                               | <b>Metabolism of amino acids and related molecules</b>                          |

|           |             |              |            |           |            |             |                     |                   |                                                                        |                                               |
|-----------|-------------|--------------|------------|-----------|------------|-------------|---------------------|-------------------|------------------------------------------------------------------------|-----------------------------------------------|
| <b>26</b> | <b>-1.5</b> | <b>22619</b> | <b>392</b> | <b>4</b>  | <b>26%</b> | <b>5.28</b> | <b>PFREUD_06110</b> | <b>SodA</b>       | <b>Superoxide dismutase</b>                                            | <b>Miscellaneous</b>                          |
| <b>27</b> | <b>-1.5</b> | <b>22619</b> | <b>611</b> | <b>16</b> | <b>47%</b> | <b>5.28</b> | <b>PFREUD_06110</b> | <b>SodA</b>       | <b>Superoxide dismutase</b>                                            | <b>Miscellaneous</b>                          |
| 28*       | -2.4        | 22828        | 719        | 13        | 68%        | 5.28        | PFREUD_06110        | SodA              | superoxide dismutase                                                   | Miscellaneous                                 |
|           |             |              |            |           |            |             |                     |                   | <b><i>B12 biosynthesis</i></b>                                         |                                               |
| 13        | 1.6         | 35968        | 740        | 12        | 49%        | 4.89        | PFREUD_18910        | HemB              | delta-aminolevulinic acid dehydratase                                  | Metabolism of coenzymes and prosthetic groups |
|           |             |              |            |           |            |             |                     |                   | <b><i>Miscellaneous</i></b>                                            |                                               |
| <b>18</b> | <b>1.6</b>  | <b>23335</b> | <b>530</b> | <b>7</b>  | <b>44%</b> | <b>5.02</b> | <b>PFREUD_23970</b> | <b><u>SDR</u></b> | <b>Oxidoreductase</b>                                                  | <b>Miscellaneous</b>                          |
| 20        | -1.7        | 40589        | 147        | 2         | 8%         | 5.34        | PFREUD_19130        | AdhC              | zinc-containing alcohol dehydrogenase                                  | Miscellaneous                                 |
|           |             |              |            |           |            |             |                     |                   | <b><i>Other</i></b>                                                    |                                               |
| 9         | 1.5         | 46935        | 174        | 2         | 8%         | 5.3         | PFREUD_19280        | PurA              | adenylosuccinate synthetase                                            | Metabolism of nucleotides and nucleic acids   |
| 17        | 2.2         | 29040        | 179        | 2         | 15%        | 4.81        | PFREUD_03380        | ThiM              | Hydroxyethylthiazole kinase                                            | Metabolism of coenzymes and prosthetic groups |
| 20        | -1.7        | 39350        | 256        | 3         | 22%        | 5.19        | PFREUD_21640        | <u>CysD</u>       | sulfate adenylyltransferase                                            | Metabolism of sulfur                          |
| 28        | -2.4        | 19697        | 174        | 2         | 15%        | 5.24        | PFREUD_23460        | SSB               | ssDNA-binding protein                                                  | DNA replication                               |
| 12*       | 2.1         | 40517        | 1261       | 30        | 80%        | 4.75        | PFREUD_16140        | PF47              | protein mrp (ATP-binding protein involved in chromosome partitioning ) | Adaptation to atypical conditions             |

**Table S2** List of proteins detected by nano-LC-MS/MS from spots with relative abundance fold-change  $\geq 1.5$  (ANOVA,  $p \leq 0.05$ ) from PPA and SWP media during stationary growth phase. Spots with single identification are in bold. From spots with multiple protein identification those with the highest Mascot identification score are indicated and marked with an asterisk

| Spot no.                            | Fold-change (PPA/SWP) | Mw (Da) | pI   | ID score | No. match. pept. | Seq. cov. (%) | Locus in reference organism | Name  | Annotation                           | Category                                        |
|-------------------------------------|-----------------------|---------|------|----------|------------------|---------------|-----------------------------|-------|--------------------------------------|-------------------------------------------------|
| <b><i>Amino acid metabolism</i></b> |                       |         |      |          |                  |               |                             |       |                                      |                                                 |
| 44*                                 | 2.3                   | 52727   | 5.17 | 620      | 7                | 20            | PFREUD_08280                | ThrC  | threonine synthase                   | Metabolism of amino acids and related molecules |
| 44                                  | 2.3                   | 52087   | 5.28 | 274      | 3                | 9             | PFREUD_18740                | GlyA  | glycine hydroxymethyltransferase     | Metabolism of amino acids and related molecules |
| 48                                  | 1.5                   | 48354   | 5.28 | 147      | 2                | 5             | PFREUD_20440                | MAO   | flavin-containing amine oxidase      | Metabolism of amino acids and related molecules |
| 50*                                 | 3                     | 39604   | 4.81 | 829      | 34               | 26            | PFREUD_00370                | AlaDH | alanine dehydrogenase                | Cell wall                                       |
| 51*                                 | 2                     | 39604   | 4.81 | 804      | 20               | 26            | PFREUD_00370                | AlaDH | alanine dehydrogenase                | Cell wall                                       |
| 64*                                 | -1.6                  | 55513   | 4.95 | 848      | 11               | 27            | PFREUD_11910                | TrpE  | anthranilate synthase component I    | Metabolism of amino acids and related molecules |
| 65                                  | -1.5                  | 52727   | 5.17 | 411      | 6                | 12            | PFREUD_08280                | ThrC  | threonine synthase                   | Metabolism of amino acids and related molecules |
| 65                                  | -1.5                  | 48354   | 5.28 | 201      | 2                | 5             | PFREUD_20440                | MAO   | flavin-containing amine oxidase      | Metabolism of amino acids and related molecules |
| 71                                  | -                     | 43566   | 5.53 | 193      | 2                | 7             | PFREUD_13960                | ArgD  | acetylornithine aminotransferase     | Metabolism of amino acids and related molecules |
| 73                                  | -2.1                  | 44997   | 5.13 | 168      | 3                | 7             | PFREUD_14000                | AlaT  | aspartate aminotransferase           | Metabolism of amino acids and related molecules |
| 77                                  | -1.8                  | 36744   | 5.16 | 196      | 2                | 11            | PFREUD_20100                | ASADH | aspartate-semialdehyde dehydrogenase | Metabolism of amino acids and related molecules |
| 88                                  | -1.6                  | 30334   | 5.02 | 659      | 11               | 38            | PFREUD_11900                | TrpC  | indole-3-glycerol phosphate synthase | Metabolism of amino acids and related molecules |
| 88                                  | -1.6                  | 30601   | 4.85 | 128      | 2                | 4             | PFREUD_16230                | LDC   | lysine decarboxylase                 | Metabolism of amino acids and related molecules |
| <b><i>Aspartate metabolism</i></b>  |                       |         |      |          |                  |               |                             |       |                                      |                                                 |
| 43*                                 | 3.6                   | 53385   | 5.14 | 825      | 62               | 25            | PFREUD_16320                | AspA1 | aspartate ammonia-lyase              | Metabolism of amino acids and related molecules |
| 43                                  | 3.6                   | 53526   | 5.12 | 748      | 48               | 26            | PFREUD_16330                | AspA2 | aspartate ammonia-lyase              | Metabolism of amino acids and related molecules |
| 45*                                 | 2.4                   | 53526   | 5.12 | 805      | 27               | 28            | PFREUD_16330                | AspA2 | aspartate ammonia-lyase              | Metabolism of amino acids and related molecules |

|                                                   |      |       |      |      |    |    |              |       |                                                 |                                                                                                           |
|---------------------------------------------------|------|-------|------|------|----|----|--------------|-------|-------------------------------------------------|-----------------------------------------------------------------------------------------------------------|
| 45                                                | 2.4  | 53385 | 5.14 | 776  | 28 | 25 | PFREUD_16320 | AspA1 | aspartate ammonia-lyase                         | Metabolism of amino acids and related molecules                                                           |
| 45                                                | 2.4  | 52812 | 4.99 | 145  | 2  | 6  | PFREUD_01460 | ArgG  | argininosuccinate synthase                      | Metabolism of amino acids and related molecules                                                           |
| 65                                                | -1.5 | 48951 | 5.17 | 777  | 9  | 23 | PFREUD_13940 | ArgH  | argininosuccinate lyase                         | Metabolism of amino acids and related molecules                                                           |
| <b>Valine leucine and isoleucine biosynthesis</b> |      |       |      |      |    |    |              |       |                                                 |                                                                                                           |
| 76*                                               | -2.1 | 37335 | 5.01 | 819  | 15 | 46 | PFREUD_13390 | IlvC  | ketol-acid reductoisomerase                     | Metabolism of amino acids and related molecules                                                           |
| 76                                                | -2.1 | 40036 | 5.02 | 259  | 3  | 15 | PFREUD_13390 | IlvE  | branched-subunit amino acid aminotransferase    | Metabolism of amino acids and related molecules                                                           |
| <b>Carbohydrate metabolism</b>                    |      |       |      |      |    |    |              |       |                                                 |                                                                                                           |
| <b>Pentose phosphate</b>                          |      |       |      |      |    |    |              |       |                                                 |                                                                                                           |
| 32                                                | 2    | 97159 | 5.61 | 239  | 2  | 8  | PFREUD_12930 | Phk   | phosphoketolase pyrophosphate                   | Main glycolytic pathways                                                                                  |
| 33                                                | 3    | 97159 | 5.61 | 430  | 7  | 10 | PFREUD_12930 | Phk   | phosphoketolase pyrophosphate                   | Main glycolytic pathways                                                                                  |
| 34                                                | 4.2  | 97159 | 5.61 | 650  | 7  | 14 | PFREUD_12930 | Phk   | phosphoketolase pyrophosphate                   | Main glycolytic pathways                                                                                  |
| 44                                                | 2.3  | 55556 | 5.21 | 538  | 9  | 20 | PFREUD_00760 | XylB  | xylulokinase                                    | Metabolism of carbohydrates and related molecules                                                         |
| 65                                                | -1.5 | 52863 | 5.25 | 915  | 14 | 20 | PFREUD_08090 | Gnd2  | 6-phosphogluconate dehydrogenase                | Main glycolytic pathways                                                                                  |
| 66*                                               | -1.5 | 52863 | 5.25 | 1117 | 14 | 25 | PFREUD_08090 | Gnd2  | 6-phosphogluconate dehydrogenase                | Main glycolytic pathways                                                                                  |
| 74*                                               | -1.8 | 38056 | 4.84 | 651  | 10 | 36 | PFREUD_04970 | Tal1  | transaldolase                                   | Main glycolytic pathways                                                                                  |
| 87                                                | -3.6 | 32249 | 5.4  | 477  | 4  | 31 | PFREUD_15070 | OpcA  | glucose 6-phosphate dehydrogenase effector OpcA | Main glycolytic pathways                                                                                  |
| 69                                                | -1.7 | 42603 | 5.44 | 200  | 2  | 10 | PFREUD_00690 | AckA  | acetate kinase                                  | Metabolism of carbohydrates and related molecules                                                         |
| 71                                                | -    | 42603 | 5.44 | 196  | 3  | 10 | PFREUD_00690 | AckA  | acetate kinase                                  | Metabolism of carbohydrates and related molecules                                                         |
| <b>Glycolysis</b>                                 |      |       |      |      |    |    |              |       |                                                 |                                                                                                           |
| 35                                                | 1.9  | 96275 | 4.81 | 1272 | 12 | 28 | PFREUD_03230 | PPDK  | pyruvate phosphate dikinase                     | Metabolism of carbohydrates and related molecules                                                         |
| 50                                                | 3    | 43333 | 4.94 | 798  | 11 | 35 | PFREUD_12040 | PFP   | pyrophosphate phosphofructokinase               | Carbohydrate metabolism                                                                                   |
| 51                                                | 2    | 43333 | 4.94 | 531  | 8  | 27 | PFREUD_12040 | PFP   | pyrophosphate phosphofructokinase               | Carbohydrate metabolism                                                                                   |
| 62                                                | -1.9 | 63416 | 4.88 | 417  | 6  | 16 | PFREUD_23740 | AgIA  | alpha-1,4-glucosidase                           | Specific carbohydrate metabolic pathway (galactose)                                                       |
| 63                                                | -    | 58031 | 5.05 | 265  | 2  | 9  | PFREUD_19470 | PtsA  | PTS enzyme I                                    | Protein of unknown function, without similarity to other proteins (carbohydrate transport and metabolism) |
| 67*                                               | -1.8 | 42524 | 5.21 | 1217 | 23 | 48 | PFREUD_15120 | PGK   | phosphoglycerate kinase                         | Main glycolytic pathways                                                                                  |

|                         |             |               |             |             |           |           |                     |              |                                                             |                                                          |
|-------------------------|-------------|---------------|-------------|-------------|-----------|-----------|---------------------|--------------|-------------------------------------------------------------|----------------------------------------------------------|
| 68                      | -1.5        | 42524         | 5.21        | 251         | 3         | 14        | PFREUD_15120        | PGK          | phosphoglycerate kinase                                     | Main glycolytic pathways                                 |
| 74                      | -1.8        | 34225         | 4.91        | 413         | 5         | 19        | PFREUD_12840        | L-LDH        | L-lactate dehydrogenase                                     | Main glycolytic pathways                                 |
| <b>75</b>               | <b>-3</b>   | <b>34225</b>  | <b>4.91</b> | <b>661</b>  | <b>15</b> | <b>31</b> | <b>PFREUD_12840</b> | <b>L-LDH</b> | <b>L-lactate dehydrogenase</b>                              | <b>Main glycolytic pathways</b>                          |
| 77*                     | -1.8        | 36261         | 5.26        | 1401        | 48        | 65        | PFREUD_15130        | GAPDH        | glyceraldehyde-3-phosphate dehydrogenase                    | Metabolism of coenzymes and prosthetic groups            |
| <b>78</b>               | <b>-1.6</b> | <b>35532</b>  | <b>5.17</b> | <b>609</b>  | <b>8</b>  | <b>27</b> | <b>PFREUD_15130</b> | <b>GAPDH</b> | <b>glyceraldehyde-3-phosphate dehydrogenase</b>             | <b>Metabolism of coenzymes and prosthetic groups</b>     |
| 79*                     | -1.8        | 35532         | 5.17        | 667         | 7         | 34        | PFREUD_15130        | GAPDH        | glyceraldehyde-3-phosphate dehydrogenase                    | Metabolism of coenzymes and prosthetic groups            |
| 79                      | -1.8        | 35795         | XX          | XX          | 11        | 33        | PFREUD_02200        | BkdA2        | 2-oxoisovalerate dehydrogenase subunit beta                 | Metabolism of amino acids and related                    |
| 80                      | -2.1        | 32398         | 5.51        | 415         | 5         | 25        | PFREUD_22330        | <u>YeaD</u>  | aldose 1-epimerase                                          | Metabolism of carbohydrates and related molecules        |
| <b>81</b>               | <b>-2</b>   | <b>32368</b>  | <b>5.02</b> | <b>582</b>  | <b>8</b>  | <b>34</b> | <b>PFREUD_23890</b> | <b>FBA2</b>  | <b>Fructose-bisphosphate aldolase class I</b>               | <b>Main glycolytic pathways</b>                          |
| 82*                     | -2.4        | 37022         | 5.21        | 525         | 10        | 27        | PFREUD_19150        | FBA1         | Fructose-bisphosphate aldolase class II                     | Main glycolytic pathways                                 |
| 83                      | -3.1        | 37022         | 5.21        | 180         | 2         | 8         | PFREUD_19150        | FBA1         | Fructose-bisphosphate aldolase class II                     | Main glycolytic pathways                                 |
| 84*                     | -1.6        | 37022         | 5.14        | 861         | 24        | 16        | PFREUD_19150        | FBA1         | Fructose-bisphosphate aldolase class II                     | Main glycolytic pathways                                 |
| 84                      | -1.6        | 35795         | 5.21        | 174         | 2         | 38        | PFREUD_02200        | BkdA2        | 2-oxoisovalerate dehydrogenase subunit beta                 | Metabolism of amino acids and related                    |
| 87*                     | -3.6        | 35532         | 5.17        | 1032        | 10        | 54        | PFREUD_15130        | GAPDH        | glyceraldehyde-3-phosphate dehydrogenase                    | Metabolism of coenzymes and prosthetic groups            |
| 88                      | -1.6        | 32368         | 5.02        | 521         | 6         | 29        | PFREUD_23890        | FBA2         | Fructose-bisphosphate aldolase class I                      | Main glycolytic pathways                                 |
| 89*                     | -1.5        | 27830         | 5.05        | 424         | 5         | 26        | PFREUD_15110        | TIM1         | triosephosphate isomerase 1                                 | Main glycolytic pathways                                 |
| <b>Wood Werkman-TCA</b> |             |               |             |             |           |           |                     |              |                                                             |                                                          |
| <b>29</b>               | <b>1.6</b>  | <b>137778</b> | <b>5.22</b> | <b>2689</b> | <b>40</b> | <b>33</b> | <b>PFREUD_01840</b> | <b>NifJ1</b> | <b>pyruvate synthase/pyruvate-flavodoxin oxidoreductase</b> | <b>Membrane bioenergetics</b>                            |
| <b>30</b>               | <b>1.9</b>  | <b>137778</b> | <b>5.22</b> | <b>2525</b> | <b>59</b> | <b>34</b> | <b>PFREUD_01840</b> | <b>NifJ1</b> | <b>pyruvate synthase/pyruvate-flavodoxin oxidoreductase</b> | <b>Membrane bioenergetics</b>                            |
| <b>31</b>               | <b>1.7</b>  | <b>137778</b> | <b>5.22</b> | <b>3124</b> | <b>71</b> | <b>42</b> | <b>PFREUD_01840</b> | <b>NifJ1</b> | <b>pyruvate synthase/pyruvate-flavodoxin oxidoreductase</b> | <b>Membrane bioenergetics</b>                            |
| <b>36</b>               | <b>1.7</b>  | <b>96275</b>  | <b>4.81</b> | <b>2351</b> | <b>50</b> | <b>39</b> | <b>PFREUD_03230</b> | <b>PPDK</b>  | <b>pyruvate phosphate dikinase</b>                          | <b>Metabolism of carbohydrates and related molecules</b> |
| <b>39</b>               | <b>2.4</b>  | <b>75276</b>  | <b>6</b>    | <b>1488</b> | <b>36</b> | <b>36</b> | <b>PFREUD_14311</b> | <b>SdhA3</b> | <b>succinate dehydrogenase flavoprotein subunit</b>         | <b>Membrane bioenergetics</b>                            |
| 40*                     | 1.9         | 75276         | 6           | 1227        | 21        | 31        | PFREUD_14310        | SdhA3        | succinate dehydrogenase flavoprotein subunit                | Membrane bioenergetics                                   |
| 41                      | 1.7         | 66057         | 5.22        | 373         | 4         | 10        | PFREUD_18860        | MmdA         | methylmalonyl-CoA carboxyltransferase subunit 12S monomer   | Specific carbohydrate metabolic pathway                  |



|                                                      |      |       |      |     |    |    |              |             |                                                          |                                                                      |
|------------------------------------------------------|------|-------|------|-----|----|----|--------------|-------------|----------------------------------------------------------|----------------------------------------------------------------------|
| 45                                                   | 2.4  | 53022 | 5    | 200 | 1  | 6  | PFREUD_19100 | lolA        | myo-inositol catabolism protein lolA                     | Specific carbohydrate metabolic pathway                              |
| 45                                                   | 2.4  | 57987 | 5.97 | 184 | 2  | 6  | PFREUD_18870 | <u>PycB</u> | methylmalonyl-CoA carboxyltransferase 5S subunit monomer | Metabolism of carbohydrates and related molecules                    |
| 46*                                                  | 2    | 49814 | 5.08 | 483 | 5  | 22 | PFREUD_10890 | LPD         | dihydrolipoamide dehydrogenase                           | Metabolism of carbohydrates and related molecules                    |
| 48*                                                  | 1.5  | 51435 | 5.34 | 897 | 56 | 39 | PFREUD_16300 | FumC        | fumarate hydratase class II                              | TCA cycle                                                            |
| 49                                                   | 1.6  | 48580 | 5.67 | 276 | 3  | 14 | PFREUD_01090 | GitA2       | citrate synthase                                         | TCA cycle                                                            |
| 53                                                   | 1.9  | 27939 | 5.42 | 117 | 0  | 9  | PFREUD_09260 | SdhB        | succinate dehydrogenase subunit B                        | Membrane bioenergetics                                               |
| 55*                                                  | 2.8  | 27939 | 5.42 | 269 | 3  | 18 | PFREUD_09260 | SdhB        | succinate dehydrogenase subunit B                        | Membrane bioenergetics                                               |
| 64                                                   | -1.6 | 49814 | 5.08 | 466 | 7  | 19 | PFREUD_10890 | LPD         | dihydrolipoamide dehydrogenase                           | Metabolism of carbohydrates and related molecules                    |
| 65                                                   | -1.5 | 51435 | 5.34 | 310 | 2  | 17 | PFREUD_16300 | FumC        | fumarate hydratase class II                              | TCA cycle                                                            |
| 66                                                   | -1.5 | 51435 | 5.34 | 420 | 5  | 18 | PFREUD_16300 | FumC        | fumarate hydratase class II                              | TCA cycle                                                            |
| 67                                                   | -1.8 | 47181 | 5.29 | 628 | 6  | 24 | PFREUD_09540 | GabT        | <b>4-aminobutyrate aminotransferase</b>                  | Metabolism of amino acids and related molecules                      |
| 68                                                   | -1.5 | 47181 | 5.29 | 719 | 9  | 29 | PFREUD_09540 | GabT        | <b>4-aminobutyrate aminotransferase</b>                  | Metabolism of amino acids and related molecules                      |
| 80                                                   | -2.1 | 31447 | 5.22 | 504 | 5  | 28 | PFREUD_16110 | CitE        | citrate lyase subunit beta                               | TCA cycle                                                            |
| 87                                                   | -3.6 | 31447 | 5.22 | 220 | 2  | 9  | PFREUD_16110 | CitE        | citrate lyase subunit beta                               | TCA cycle                                                            |
| <b>Lipid metabolism</b>                              |      |       |      |     |    |    |              |             |                                                          |                                                                      |
| 51                                                   | 2    | 45661 | 4.79 | 123 | 2  | 4  | PFREUD_02430 | CaiB        | crotonobetainyl-CoA:carnitine CoA-transferase            | Metabolism of lipids                                                 |
| 56                                                   | 2    | 25770 | 4.72 | 132 | 2  | 8  | PFREUD_02480 | FixA        | electron transfer flavoprotein FixA                      | Membrane bioenergetics (electron transport subunit and ATP synthase) |
| 61*                                                  | -2.3 | 61241 | 5.08 | 806 | 9  | 24 | PFREUD_23780 | CaiC        | Fatty-acyl-CoA synthase                                  | Metabolism of lipids                                                 |
| <b>Metabolism of coenzymes and prosthetic groups</b> |      |       |      |     |    |    |              |             |                                                          |                                                                      |
| 52                                                   | 1.5  | 39443 | 5.22 | 176 | 2  | 8  | PFREUD_06270 | PanK        | pantothenate kinase                                      | Metabolism of coenzymes and prosthetic groups                        |
| 52                                                   | 1.5  | 41862 | 5.19 | 175 | 2  | 7  | PFREUD_10010 | BioB        | biotin synthase                                          | Metabolism of coenzymes and prosthetic groups                        |
| 73                                                   | -2.1 | 41862 | 5.19 | 161 | 2  | 7  | PFREUD_10010 | BioB        | biotin synthase                                          | Metabolism of coenzymes and prosthetic groups                        |
| 77                                                   | -1.8 | 36833 | 5.26 | 473 | 7  | 25 | PFREUD_07540 | MenB        | naphthoate synthase                                      | Metabolism of coenzymes and prosthetic groups                        |
| 82                                                   | -2.4 | 31387 | 5.14 | 181 | 2  | 11 | PFREUD_15040 | PdxS        | pyridoxal biosynthesis lyase PdxS                        | Metabolism of coenzymes and prosthetic groups                        |
| 88*                                                  | -1.6 | 31387 | 5.14 | 696 | 12 | 34 | PFREUD_15040 | PdxS        | pyridoxal biosynthesis lyase PdxS                        | Metabolism of coenzymes and prosthetic groups                        |

|                               |      |            |      |      |    |    |              |                             |                                                                                                |                                                                      |
|-------------------------------|------|------------|------|------|----|----|--------------|-----------------------------|------------------------------------------------------------------------------------------------|----------------------------------------------------------------------|
| 88                            | -1.6 | 32235      | 5.05 | 291  | 3  | 19 | PFREUD_12810 | KPR                         | 2-dehydropantoate 2-reductase                                                                  | Metabolism of coenzymes and prosthetic groups                        |
| 83                            | -3.1 | 30812      | 5.23 | 184  | 2  | 11 | PFREUD_06840 | FoID                        | methylenetetrahydrofolate dehydrogenase (bifunctional protein FoID)                            | Metabolism of coenzymes and prosthetic groups                        |
| 84                            | -1.6 | 30812      | 5.29 | 177  | 2  | 14 | PFREUD_06840 | FoID                        | methylenetetrahydrofolate dehydrogenase (bifunctional protein FoID)                            | Metabolism of coenzymes and prosthetic groups                        |
| <b>Membrane bioenergetics</b> |      |            |      |      |    |    |              |                             |                                                                                                |                                                                      |
| 32*                           | 2    | 10170<br>7 | 5.68 | 1185 | 22 | 22 | PFREUD_04320 | <u>GlcD/</u><br><u>GlpC</u> | FAD-linked oxidase multidomain                                                                 | Membrane bioenergetics (electron transport subunit and ATP synthase) |
| 33*                           | 3    | 10170<br>7 | 5.68 | 1780 | 36 | 28 | PFREUD_04320 | <u>GlcD/</u><br><u>GlpC</u> | FAD-linked oxidase multidomain                                                                 | Membrane bioenergetics (electron transport subunit and ATP synthase) |
| 34*                           | 4.2  | 10170<br>7 | 5.68 | 1727 | 38 | 29 | PFREUD_04320 | <u>GlcD/</u><br><u>GlpC</u> | FAD-linked oxidase multidomain                                                                 | Membrane bioenergetics (electron transport subunit and ATP synthase) |
| 41*                           | 1.7  | 60757      | 5.45 | 1613 | 41 | 47 | PFREUD_01830 | <u>GLS</u>                  | Putative glutamate synthase                                                                    | Membrane bioenergetics                                               |
| 42                            | 1.9  | 60757      | 5.45 | 1966 | 67 | 62 | PFREUD_01830 | GLS                         | <b>Putative glutamate synthase</b>                                                             | <b>Membrane bioenergetics</b>                                        |
| 47                            | 1.5  | 47953      | 5.7  | 678  | 11 | 27 | PFREUD_05140 | GGR                         | <b>Electron transfer oxidoreductase (Geranylgeranyl reductase superfamily)</b>                 | <b>Membrane bioenergetics</b>                                        |
| 49*                           | 1.6  | 49297      | 5.72 | 1432 | 36 | 48 | PFREUD_05210 | NuoF                        | NADH dehydrogenase I subunit F                                                                 | Membrane bioenergetics (electron transport subunit and ATP synthase) |
| 58                            | -1.8 | 85720      | 5.1  | 185  | 1  | 5  | PFREUD_05220 | NuoG                        | NADH dehydrogenase I subunit G                                                                 | Membrane bioenergetics (electron transport subunit and ATP synthase) |
| 63*                           | -    | 61453      | 5.06 | 1182 | 20 | 36 | PFREUD_10470 | AtpA                        | ATP synthase subunit alpha                                                                     | Membrane bioenergetics (electron transport subunit and ATP synthase) |
| <b>Transport proteins</b>     |      |            |      |      |    |    |              |                             |                                                                                                |                                                                      |
| 53                            | 1.9  | 28958      | 5.4  | 281  | 6  | 18 | PFREUD_14840 | FepC                        | ABC transporter ATP-binding protein ( ABC-type cobalamin/Fe3+-siderophores transport systems)  | Transport/binding proteins and lipoproteins                          |
| 62                            | -1.9 | 61661      | 5.06 | 932  | 13 | 27 | PFREUD_05930 | DdpA                        | ABC transporter substrate-binding protein                                                      | Transport/binding of proteins/peptides                               |
| 87                            | -3.6 | 29828      | 5.26 | 513  | 5  | 35 | PFREUD_19980 | PstB                        | phosphate ABC transporter substrate-binding protein                                            | Transport/binding of inorganic ions                                  |
| 87                            | -3.6 | 31039      | 5.45 | 291  | 3  | 19 | PFREUD_10060 | DppF                        | ABC transporter ATP-binding protein ( ABC-type dipeptide/oligopeptide/nickel transport system) | Transport/binding of inorganic ions                                  |
| 80                            | -2.1 | 36077      | 5.35 | 172  | 3  | 8  | PFREUD_07640 | ArgK                        | kinase                                                                                         | Transport/binding of amino-acids                                     |

|                                     |          |              |             |            |          |           |                     |               |                                                 |                                                    |
|-------------------------------------|----------|--------------|-------------|------------|----------|-----------|---------------------|---------------|-------------------------------------------------|----------------------------------------------------|
| <b>Cell wall biogenesis</b>         |          |              |             |            |          |           |                     |               |                                                 |                                                    |
| 38                                  | 2.6      | 78318        | 4.94        | 180        | 2        | 5         | PFREUD_19400        | PBP-1A        | penicillin-binding protein                      | Cell wall                                          |
| 68*                                 | -1.5     | 45318        | 5.29        | 886        | 14       | 41        | PFREUD_00570        | UGM           | UDP-galactopyranose mutase                      | Cell wall                                          |
| 74                                  | -1.8     | 40727        | 4.85        | 472        | 5        | 21        | PFREUD_13250        | DdIA          | D-alanine--D-alanine ligase                     | Cell wall                                          |
| <b>DNA recombination and repair</b> |          |              |             |            |          |           |                     |               |                                                 |                                                    |
| 52                                  | 1.5      | 39046        | 5.11        | 365        | 5        | 18        | PFREUD_20160        | DisA          | DNA integrity scanning protein<br>DisA          | DNA recombination, and repair                      |
| 73                                  | -2.1     | 39046        | 5.11        | 398        | 6        | 18        | PFREUD_20160        | DisA          | DNA integrity scanning protein<br>DisA          | DNA recombination, and repair                      |
| 76                                  | -2.1     | 36678        | 4.96        | 183        | 2        | 12        | PFREUD_11700        | RuvB          | Holliday junction ATP-dependent<br>DNA helicase | DNA recombination, and repair                      |
| <b>Transcription regulation</b>     |          |              |             |            |          |           |                     |               |                                                 |                                                    |
| 53                                  | 1.9      | 26294        | 5.33        | 103        | 1        | 9         | PFREUD_01400        | OmpR          | transcriptional regulator                       | Transcription regulation                           |
| 79                                  | -1.8     | 28725        | 5.26        | 309        | 4        | 18        | PFREUD_15890        | PspA          | phage shock protein A                           | Transcription regulation                           |
| 88                                  | -1.6     | 29867        | 5           | 570        | 7        | 37        | PFREUD_23070        | RpiR          | RpiR family transcriptional<br>regulator        | Transcription regulation                           |
| <b>Protein synthesis</b>            |          |              |             |            |          |           |                     |               |                                                 |                                                    |
| 35*                                 | 1.9      | 90689        | 4.74        | 1610       | 20       | 33        | PFREUD_14010        | PheRS         | phenylalanyl-tRNA synthetase<br>subunit beta    | Aminoacyl-tRNA synthetases                         |
| 38*                                 | 2.6      | 75867        | 4.88        | 1555       | 35       | 33        | PFREUD_06230        | EF-G          | GTP phosphohydrolase,<br>elongation factor G    | Translation elongation                             |
| <b>46</b>                           | <b>2</b> | <b>47518</b> | <b>4.99</b> | <b>270</b> | <b>4</b> | <b>11</b> | <b>PFREUD_01350</b> | <b>SerRS1</b> | <b>seryl-tRNA synthetase</b>                    | <b>Aminoacyl-RNA synthetases</b>                   |
| <b>Peptidases</b>                   |          |              |             |            |          |           |                     |               |                                                 |                                                    |
| 44                                  | 2.3      | 53283        | 5.2         | 363        | 3        | 14        | PFREUD_16090        | PepP          | Xaa-Pro aminopeptidase                          | Protein degradation                                |
| 65*                                 | -1.5     | 53283        | 5.2         | 1080       | 15       | 34        | PFREUD_16090        | PepP          | Xaa-Pro aminopeptidase                          | Protein degradation                                |
| 66                                  | -1.5     | 53283        | 5.2         | 975        | 13       | 33        | PFREUD_16090        | PepP          | Xaa-Pro aminopeptidase                          | Protein degradation                                |
| 72*                                 | -2.4     | 42925        | 5           | 946        | 22       | 33        | PFREUD_00340        | AbgB          | amidohydrolase                                  | Protein degradation                                |
| 73                                  | -2.1     | 39184        | 5.31        | 327        | 3        | 19        | PFREUD_08810        | PIP2          | proline iminopeptidase                          | Protein degradation                                |
| 74                                  | -1.8     | 33462        | 4.8         | 132        | 1        | 5         | PFREUD_16060        | MAP           | methionine aminopeptidase                       | Protein degradation                                |
| <b>Selenocompound metabolism</b>    |          |              |             |            |          |           |                     |               |                                                 |                                                    |
| 51                                  | 2        | 45129        | 4.93        | 593        | 7        | 20        | PFREUD_22880        | CBL           | cystathionine beta-lyase                        | Metabolism of amino acids and related<br>molecules |
| 52                                  | 1.5      | 41688        | 5.17        | 283        | 3        | 13        | PFREUD_18590        | CGS           | cystathionine gamma-synthase                    | Metabolism of amino acids and related<br>molecules |
| 62*                                 | -1.9     | 62897        | 4.68        | 1023       | 11       | 33        | PFREUD_06960        | MetRS         | methionyl-tRNA synthetase                       | Aminoacyl-tRNA synthetases                         |

|                              |             |              |             |             |           |           |                     |              |                                                                           |                                                                        |
|------------------------------|-------------|--------------|-------------|-------------|-----------|-----------|---------------------|--------------|---------------------------------------------------------------------------|------------------------------------------------------------------------|
| 69*                          | -1.7        | 45374        | 5.44        | 884         | 11        | 36        | PFREUD_14940        | SufS         | cysteine desulfurase                                                      | Transport/binding proteins and lipoproteins                            |
| 71*                          | -           | 45374        | 5.44        | 946         | 9         | 36        | PFREUD_14940        | SufS         | cysteine desulfurase                                                      | Transport/binding proteins and lipoproteins                            |
| 73*                          | -2.1        | 41688        | 5.17        | 411         | 8         | 18        | PFREUD_18590        | CGS          | cystathionine gamma-synthase                                              | Metabolism of amino acids and related molecules                        |
| 73                           | -2.1        | 39350        | 5.19        | 255         | 2         | 17        | PFREUD_21640        | <u>CysD</u>  | sulfate adenylyltransferase                                               | Metabolism of sulfur                                                   |
| <b>Pirimidine metabolism</b> |             |              |             |             |           |           |                     |              |                                                                           |                                                                        |
| 72                           | -2.4        | 42817        | 5.08        | 396         | 4         | 14        | PFREUD_11480        | CarA         | carbamoyl-phosphate synthase small subunit                                | Transport/binding of nucleosides, nucleotides, purines and pyrimidines |
| 77                           | -1.8        | 37599        | 5.18        | 316         | 4         | 12        | PFREUD_17440        | PyrB         | aspartate carbamoyltransferase                                            | Metabolism of nucleotides and nucleic acids                            |
| <b>Stress proteins</b>       |             |              |             |             |           |           |                     |              |                                                                           |                                                                        |
| <b>37</b>                    | <b>2.3</b>  | <b>94317</b> | <b>5.33</b> | <b>2756</b> | <b>48</b> | <b>44</b> | <b>PFREUD_17920</b> | <b>ClpB2</b> | <b>ATP-dependent Clp protease B2</b>                                      | <b>Protein folding</b>                                                 |
| 58*                          | -1.8        | 93458        | 5.07        | 2390        | 38        | 42        | PFREUD_19250        | ClpB1        | ATP-dependent Clp protease B1                                             | Protein folding                                                        |
| <b>59</b>                    | <b>-2</b>   | <b>93458</b> | <b>5.07</b> | <b>2766</b> | <b>46</b> | <b>50</b> | <b>PFREUD_19250</b> | <b>ClpB1</b> | <b>ATP-dependent Clp protease B1</b>                                      | <b>Protein folding</b>                                                 |
| <b>60</b>                    | <b>-1.5</b> | <b>93458</b> | <b>5.07</b> | <b>2527</b> | <b>49</b> | <b>46</b> | <b>PFREUD_19250</b> | <b>ClpB1</b> | <b>ATP-dependent Clp protease B1</b>                                      | <b>Protein folding</b>                                                 |
| 68                           | -1.5        | 43958        | 5.3         | 480         | 7         | 23        | PFREUD_22290        | MshA         | group 1 glycosyl transferase (D-inositol-3-phosphate glycosyltransferase) | Cell wall (mycothiol biosynthesis)                                     |
| <b>70</b>                    | <b>-2</b>   | <b>49226</b> | <b>5.5</b>  | <b>1290</b> | <b>20</b> | <b>51</b> | <b>PFREUD_17610</b> | <b>GDH</b>   | <b>glutamate dehydrogenase</b>                                            | <b>Metabolism of amino acids and related molecules</b>                 |
| 71                           | -           | 49226        | 5.5         | 120         | 2         | 4         | PFREUD_17610        | GDH          | glutamate dehydrogenase                                                   | Metabolism of amino acids and related molecules                        |
| 79                           | -1.8        | 33620        | 5.14        | 231         | 2         | 16        | PFREUD_16420        | Cys2         | cysteine synthase A                                                       | Metabolism of amino acids and related molecules                        |
| 80*                          | -2.1        | 33620        | 5.14        | 650         | 17        | 33        | PFREUD_16420        | Cys2         | cysteine synthase A                                                       | Metabolism of amino acids and related molecules                        |
| 82                           | -2.4        | 33620        | 5.14        | 418         | 5         | 21        | PFREUD_16420        | Cys2         | cysteine synthase A                                                       | Metabolism of amino acids and related molecules                        |
| 83*                          | -3.1        | 33620        | 5.14        | 522         | 5         | 35        | PFREUD_16420        | Cys2         | cysteine synthase A                                                       | Metabolism of amino acids and related molecules                        |
| 84                           | -1.6        | 33620        | 5.14        | 299         | 3         | 13        | PFREUD_16420        | Cys2         | cysteine synthase A                                                       | Metabolism of amino acids and related molecules                        |
| <b>85</b>                    | <b>-3.7</b> | <b>33620</b> | <b>5.14</b> | <b>431</b>  | <b>6</b>  | <b>28</b> | <b>PFREUD_16420</b> | <b>Cys2</b>  | <b>cysteine synthase A</b>                                                | <b>Metabolism of amino acids and related molecules</b>                 |
| <b>86</b>                    | <b>-</b>    | <b>33620</b> | <b>5.14</b> | <b>826</b>  | <b>47</b> | <b>54</b> | <b>PFREUD_16420</b> | <b>Cys2</b>  | <b>cysteine synthase A</b>                                                | <b>Metabolism of amino acids and related molecules</b>                 |
| 87                           | -3.6        | 33620        | 5.14        | 842         | 11        | 35        | PFREUD_16420        | Cys2         | cysteine synthase A                                                       | Metabolism of amino acids and related molecules                        |
| 90*                          | -1.7        | 26907        | 5.18        | 849         | 17        | 58        | PFREUD_14950        | SufC         | ABC transporter ATPase                                                    | Transport/binding proteins and lipoproteins                            |

|           |             |              |             |            |           |           |                     |                     |                                                                                     |                                                                      |
|-----------|-------------|--------------|-------------|------------|-----------|-----------|---------------------|---------------------|-------------------------------------------------------------------------------------|----------------------------------------------------------------------|
| <b>92</b> | <b>-1.5</b> | <b>22619</b> | <b>5.28</b> | <b>314</b> | <b>6</b>  | <b>18</b> | <b>PFREUD_06110</b> | <b>SodA</b>         | <b>Superoxide dismutase</b>                                                         | <b>Miscellaneous</b>                                                 |
| <b>93</b> | <b>-5.2</b> | <b>16830</b> | <b>4.93</b> | <b>575</b> | <b>8</b>  | <b>58</b> | <b>PFREUD_09500</b> | <b>IbpA</b>         | <b>Molecular chaperone (small heat shock protein)</b>                               | <b>Protein folding</b>                                               |
|           |             |              |             |            |           |           |                     |                     | <b><i>B</i><sub>12</sub> biosynthesis</b>                                           |                                                                      |
| 65        | -1.5        | 49597        | 5.19        | 764        | 11        | 31        | PFREUD_19260        | HemL2               | glutamate-1-semialdehyde 2,1-aminomutase                                            | <b>Metabolism of coenzymes and prosthetic groups</b>                 |
| 66        | -1.5        | 49597        | 5.19        | 949        | 15        | 37        | PFREUD_19260        | HemL2               | glutamate-1-semialdehyde 2,1-aminomutase                                            | <b>Metabolism of coenzymes and prosthetic groups</b>                 |
| 72        | -2.4        | 46227        | 5.1         | 216        | 2         | 11        | PFREUD_18880        | HemL1               | glutamate-1-semialdehyde 2,1-aminomutase                                            | <b>Metabolism of coenzymes and prosthetic groups</b>                 |
| 89        | -1.5        | 26867        | 4.91        | 404        | 7         | 34        | PFREUD_07680        | CbiL                | CbiL. Precorrin-2 C20-methyltransferase                                             | <b>Metabolism of coenzymes and prosthetic groups</b>                 |
| 90        | -1.7        | 25015        | 5.22        | 260        | 3         | 25        | PFREUD_05110        | CbiO                | ABC transporter ATP-binding protein                                                 | Transport/binding proteins and lipoproteins                          |
|           |             |              |             |            |           |           |                     |                     | <b>Miscellaneous</b>                                                                |                                                                      |
| 53*       | 1.9         | 29476        | 5.56        | 311        | 8         | 17        | PFREUD_18650        | GlpC                | Oxidoreductase                                                                      | Miscellaneous                                                        |
| 54*       | 2           | 29476        | 5.56        | 507        | 14        | 34        | PFREUD_18650        | GlpC                | Oxidoreductase                                                                      | Miscellaneous                                                        |
| 55        | 2.8         | 29476        | 5.56        | 156        | 3         | 9         | PFREUD_18650        | GlpC                | Oxidoreductase                                                                      | Miscellaneous                                                        |
| <b>57</b> | <b>1.6</b>  | <b>24018</b> | <b>5.18</b> | <b>352</b> | <b>21</b> | <b>33</b> | <b>PFREUD_22440</b> | <b><u>SDR_c</u></b> | <b>Short subunit dehydrogenase (classical)</b>                                      | <b>Miscellaneous</b>                                                 |
| 78*       | -1.6        | 37025        | 5.36        | 755        | 12        | 37        | PFREUD_13440        | <u>Kv</u>           | aldo/keto reductase (voltage-dependent potassium channel beta subunit)              | Miscellaneous                                                        |
| 87        | -3.6        | 31191        | 5.49        | 685        | 9         | 39        | PFREUD_03160        | <u>DkgA</u>         | aldo/keto reductase (2,5-diketo-D-gluconate reductase A)                            | Miscellaneous                                                        |
| <b>91</b> | <b>-1.8</b> | <b>23335</b> | <b>5.02</b> | <b>476</b> | <b>6</b>  | <b>46</b> | <b>PFREUD_23970</b> | <b><u>SDR</u></b>   | <b>Oxidoreductase</b>                                                               | <b>Miscellaneous</b>                                                 |
|           |             |              |             |            |           |           |                     |                     | <b>Other</b>                                                                        |                                                                      |
| 40        | 1.9         | 68281        | 5.95        | 404        | 6         | 15        | PFREUD_21620        | CysI                | Sulfite reductase [ferredoxin]                                                      | 2.7 Metabolism of sulfur                                             |
| 50        | 3           | 42499        | 5.17        | 212        | 2         | 10        | PFREUD_03730        | <u>Csb1-like</u>    | CRISPR-associated protein with similarity to Csb1                                   | 6. Protein of unknown function, without similarity to other proteins |
| 51        | 2           | 43375        | 4.87        | 306        | 3         | 18        | PFREUD_03120        | <u>DUF1015</u>      | Protein of unknown function (DUF1015)                                               | Protein of unknown function similar to proteins from other organisms |
| 53        | 1.9         | 27851        | 5.4         | 190        | 2         | 12        | PFREUD_16080        | <u>COG1579</u>      | Zn-ribbon protein, possibly nucleic acid-binding [General function prediction only] | Protein of unknown function similar to proteins from other organisms |
| 54        | 2           | 27851        | 5.4         | 439        | 6         | 36        | PFREUD_16080        | <u>COG1579</u>      | Zn-ribbon protein, possibly nucleic acid-binding [General function prediction only] | Protein of unknown function similar to proteins from other organisms |
| 56*       | 2           | 23227        | 4.7         | 804        | 34        | 52        | PFREUD_18630        | <u>COG1556</u>      | Uncharacterized conserved protein [Function unknown]                                | Protein of unknown function similar to proteins from other organisms |
| 61        | -2.3        | 62746        | 5.05        | 575        | 7         | 17        | PFREUD_20030        | ArsA                | arsenic ABC transporter ATPase                                                      | Detoxification                                                       |

## Supplementary Material

|    |      |       |      |     |   |    |              |   |                                                                   |                                                                      |
|----|------|-------|------|-----|---|----|--------------|---|-------------------------------------------------------------------|----------------------------------------------------------------------|
| 74 | -1.8 | 36506 | 4.78 | 251 | 2 | 13 | PFREUD_15430 | - | Protein of unknown function                                       | Protein of unknown function similar to proteins from other organisms |
| 76 | -2.1 | 39568 | 5.13 | 139 | 2 | 6  | PFREUD_11600 | - | Protein of unknown function, highly conserved in Propionibacteria | Protein of unknown function similar to proteins from other organisms |
